# Supplementary material for: Including Thermal Fluctuations in Actomyosin Stable States Increases the Predicted Force per Motor and Macroscopic Efficiency in Muscle Modelling
Source: PubMed Central journal article supplement (PMC5023195; doi:10.1371/journal.pcbi.1005083), 2016-09-14
Supplement: pcbi.1005083.s009.pdf [file pcbi.1005083.s009.pdf]

# Modeling Thermal Fluctuations in Actomyosin Stable States: An Overlooked Property in Muscle Models

Lorenzo Marcucci<sup>1,2\*</sup>, Takumi Washio<sup>3</sup>, Toshio Yanagida<sup>2</sup>,

**1** Department of Biomedical Sciences, Padova University, Padova, Italy

**2** Quantitative Biology Center, RIKEN, Suita, Japan

**3** Graduate School of Frontier Sciences, The University of Tokyo, Tokyo, Japan

These authors contributed equally to this work.

\* [lorenzo.marcucci@gmail.com](mailto:lorenzo.marcucci@gmail.com)

**Table S1. Parameter values and their descriptions**

| Parameter               | Value                    | Description                                      |
|-------------------------|--------------------------|--------------------------------------------------|
| $k$                     | 2-0.4 pN/nm              | myosin stiffness                                 |
| $\eta$                  | 70 pNns/nm               | myosin drag coefficient                          |
| $N_{XB}$                | 38                       | myosin per filament                              |
| $N_{fil}$               | 240-12                   | number of actin filaments (sarcomere - heart)    |
| LB                      | 50 nm                    | bare zone                                        |
| LM                      | 825 nm                   | myosin filament length                           |
| LA                      | 1224 nm                  | actin filament length                            |
| $d_{TT}$                | 36 nm                    | distance between two TT units                    |
| $Q_{Ca}$                | 55                       | inhibiting parameter in absence of Ca            |
| DT                      | 1 $\mu s$                | time step in single-sarcomere simulations        |
| T                       | 4 – 37 °C                | temperature in single-sarcomere heart simulation |
| $\kappa_b$              | 0.0138 pN nm/K           | Boltzmann constant                               |
| $X_{tr}$                | 10 nm                    | threshold distance for zero attachment rate      |
| $k_{WD}^0$              | 20 $\gamma^2 s^{-1}$     | basic W to D rate                                |
| $k_{DW}^0$              | 72 $s^{-1}$              | basic D to W rate                                |
| $\alpha_a$              | 9 $s^{-1}nm^{-1}$        | stretch dependence of W to S rate                |
| $\alpha_d$              | 0.54 $\alpha_a$          | stretch dependence of S to D rate                |
| $D_N$                   | 50 $s^{-1}$              | S to D rate in compression                       |
| $a_s$                   | 10 nm                    | factor of overlapping and overstretching         |
| $Ca_{on}^* = Ca_{on}$   | 4800 $s^{-1}\mu M^{-1}$  | attachment Ca rate on TT unit                    |
| $Ca_{off}^* = Ca_{off}$ | 9600 $s^{-1}$            | detachment Ca rate on TT unit                    |
| $A_f$                   | 10 <sup>-3</sup> $\mu^2$ | cross-sectional area per filament                |
