# Supplementary material for: Including Thermal Fluctuations in Actomyosin Stable States Increases the Predicted Force per Motor and Macroscopic Efficiency in Muscle Modelling
Source: PubMed Central journal article supplement (PMC5023195; doi:10.1371/journal.pcbi.1005083), 2016-09-14
Supplement: pcbi.1005083.s010.pdf [file pcbi.1005083.s010.pdf]

# Modeling Thermal Fluctuations in Actomyosin Stable States: An Overlooked Property in Muscle Models

Lorenzo Marcucci<sup>1,2\*</sup>, Takumi Washio<sup>3</sup>, Toshio Yanagida<sup>2</sup>,

**1** Department of Biomedical Sciences, Padova University, Padova, Italy

**2** Quantitative Biology Center, RIKEN, Suita, Japan

**3** Graduate School of Frontier Sciences, The University of Tokyo, Tokyo, Japan

These authors contributed equally to this work.

\* [lorenzo.marcucci@gmail.com](mailto:lorenzo.marcucci@gmail.com)

**Table S2. Attachment–detachment events and backward jumps (BJ) (normalized by  $N_{XB}$ ) in the three scenarios, in three different regions of the left ventricle wall.**

| Events/ B J | Endo      | Middle   | Epi      |
|-------------|-----------|----------|----------|
| SRI         | 11.2/0.75 | 10.5/0.6 | 7.8/0.3  |
| SRII        | 10.0/3.2  | 9.5/2.2  | 6.11/1.5 |
| SL          | 10.5/63.2 | 9.2/47.2 | 5.3/26.7 |
